# Supplementary material
Source: MDPI journal article supplement (https://www.mdpi.com/2673-4079/3/3/23)
Supplement: s1 [file s1]

*Supporting Information*

# **Human Cytotoxicity, Hemolytic Activity, Anti-Inflammatory Activity and Aqueous Solubility of Ibuprofen-based Ionic Liquids**

**Joana C. Bastos <sup>1</sup>, Nicole S. M. Vieira <sup>1</sup>, Maria Manuela Gaspar <sup>2</sup>, Ana B. Pereiro <sup>1</sup> and João M. M. Araújo <sup>1,\*</sup>**

<sup>1</sup> LAQV, REQUIMTE, Department of Chemistry, NOVA School of Science and Technology, Universidade NOVA de Lisboa, 2829-516 Caparica, Portugal

<sup>2</sup> Research Institute for Medicines (iMed.Ulisboa), Faculty of Pharmacy, Universidade de Lisboa, Av. Prof. Gama Pinto, 1649-003 Lisboa, Portugal

\* Correspondence: [jmmda@fct.unl.pt](mailto:jmmda@fct.unl.pt); Tel.: +351-212948300

## Characterization of the Ibuprofen-based Ionic Liquids

The prepared ibuprofen-based ionic liquids, ibuprofen and ibuprofen sodium salt were completely characterized by  $^1\text{H}$  and  $^{13}\text{C}$  NMR in order to check their expected structures. Additionally, the quantitative integration of their characteristic  $^1\text{H}$  NMR resonance peaks unfold the expected cation/anion correlations. Also, there were no peaks assigned to impurities in the  $^1\text{H}$  NMR spectra.

### Ibuprofen

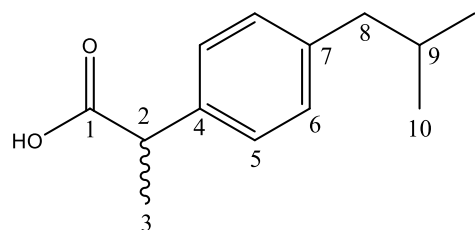

$^1\text{H}$  NMR (400 MHz,  $\text{D}_2\text{O}$ ):  $\delta/\text{ppm}$  = 7.20 (d,  $J$  = 8.0 Hz, 2H, 6), 7.15 (d,  $J$  = 8.3 Hz, 2H, 5), 3.58 (m, 1H, 2), 2.40 (d,  $J$  = 7.1 Hz, 2H, 8), 1.75 (dd,  $J$  = 13.5, 6.6 Hz, 1H, 9), 1.33 (d,  $J$  = 7.2 Hz, 3H, 3), 0.79 (d,  $J$  = 6.6 Hz, 6H, 10).

$^1\text{H}$  NMR (400 MHz, DMSO):  $\delta/\text{ppm}$  =  $\delta$  12.25 (s, 1H, OH), 7.19 (d,  $J$  = 7.9 Hz, 2H, 6), 7.11 (d,  $J$  = 7.9 Hz, 2H, 5), 3.63 (q,  $J$  = 7.1 Hz, 1H, 2), 2.42 (d,  $J$  = 7.1 Hz, 2H, 8), 1.81 (dp,  $J$  = 13.5, 6.9 Hz, 1H, 9), 1.35 (d,  $J$  = 7.1 Hz, 3H, 3), 0.86 (d,  $J$  = 6.6 Hz, 6H, 10).  $^{13}\text{C}$  NMR (101 MHz, DMSO):  $\delta/\text{ppm}$  = 175.95 (s, 1), 140.02 (s, 7), 138.94 (s, 4), 129.43 (s, 6), 127.57 (s, 5), 44.74 (s, 8), 44.68 (s, 2), 30.03 (d,  $J$  = 8.9 Hz, 9), 22.42 (d,  $J$  = 43.1 Hz, 10), 18.91 (d,  $J$  = 16.1 Hz, 3).

$^1\text{H}$  NMR (400 MHz,  $\text{CDCl}_3$ ):  $\delta/\text{ppm}$  =  $\delta$  7.25 (d,  $J$  = 7.8 Hz, 2H, 6), 7.13 (d,  $J$  = 7.8 Hz, 2H, 5), 3.74 (q,  $J$  = 7.1 Hz, 1H, 2), 2.48 (d,  $J$  = 7.1 Hz, 2H, 8), 1.87 (tt,  $J$  = 13.4, 6.7 Hz, 1H, 9), 1.52 (s, 3H, 3), 0.93 (d,  $J$  = 6.6 Hz, 6H, 10).  $^{13}\text{C}$  NMR (101 MHz,  $\text{CDCl}_3$ ):  $\delta/\text{ppm}$  = 180.61 (s, 1), 140.87 (s, 7), 137.00 (s, 4), 129.40 (s, 6), 127.29 (s, 5), 45.05 (s, 8), 44.94 (s, 2), 30.17 (s, 9), 22.40 (s, 10), 18.11 (s, 3).

### Sodium Ibuprofen

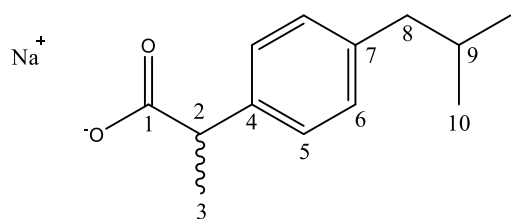

$^1\text{H}$  NMR (500 MHz,  $\text{D}_2\text{O}$ ):  $\delta/\text{ppm}$  = 7.19 (d,  $J$  = 8.0 Hz, 2H, 6), 7.13 (d,  $J$  = 7.9 Hz, 2H, 5), 3.53 (q,  $J$  = 7.1 Hz, 1H, 2), 2.40 (d,  $J$  = 7.1 Hz, 2H, 8), 1.82–1.69 (m, 1H, 9), 1.31 (d,  $J$  = 7.2 Hz, 3H, 3), 0.79 (d,  $J$  = 6.6 Hz, 6H, 10).  $^{13}\text{C}$  NMR (126 MHz,  $\text{D}_2\text{O}$ ):  $\delta/\text{ppm}$  = 183.98 (d,  $J$  = 3.0 Hz, 1), 140.67 (s, 7), 140.44 (s, 4), 129.41 (s, 6), 127.10 (s, 5), 48.12 (d,  $J$  = 3.9 Hz, 8), 44.15 (d,  $J$  = 3.9 Hz, 2), 29.68 (s, 9), 21.56 (s, 10), 18.41 (s, 3).

$^1\text{H}$  NMR (500 MHz, DMSO):  $\delta/\text{ppm}$  = 7.17 (d,  $J$  = 8.0 Hz, 2H, 6), 6.96 (d,  $J$  = 8.0 Hz, 2H, 5), 3.21 (q,  $J$  = 7.1 Hz, 1H, 2), 2.37 (d,  $J$  = 7.1 Hz, 2H, 8), 1.87–1.70 (m, 1H, 9), 1.22 (t,  $J$  = 8.2 Hz, 3H, 3), 0.86 (d,  $J$  = 6.6 Hz, 6H, 10).  $^{13}\text{C}$  NMR (101 MHz, DMSO) :  $\delta/\text{ppm}$  = 177.55 (s, 1), 143.79 (s, 7), 137.88 (s, 4), 128.48 (s, 6), 127.68 (s, 5), 49.04 (s, 8), 44.84 (s, 2), 30.19 (s, 9), 22.69 (s, 10), 20.74 (s, 3).

$^1\text{H}$  NMR (400 MHz,  $\text{CDCl}_3$ ):  $\delta/\text{ppm}$  = 7.24 (d,  $J$  = 8.0 Hz, 2H, 6), 7.12 (d,  $J$  = 8.0 Hz, 2H, 5), 3.74 (q,  $J$  = 7.0 Hz, 1H, 2), 2.47 (d,  $J$  = 7.2 Hz, 2H, 8), 1.94–1.75 (m, 1H, 9), 1.52 (d,  $J$  = 7.2 Hz, 3H, 3), 0.92 (d,  $J$  = 6.6 Hz, 6H, 10).  $^{13}\text{C}$  NMR (101 MHz,  $\text{CDCl}_3$ ):  $\delta/\text{ppm}$  = 179.40–176.46

(m, 1), 142.58 – 138.96 (m, 7), 137.83 – 135.65 (m, 4), 129.42 (s, 6), 127.25 (s, 5), 45.04 (s, 8), 44.74 – 44.31 (m, 2), 30.16 (s, 9), 22.38 (s, 10), 18.20 (s, 3).

### 1-Ethyl-3-methylimidazolium ibuprofenate ([C<sub>2</sub>C<sub>1</sub>Im][Ibu])

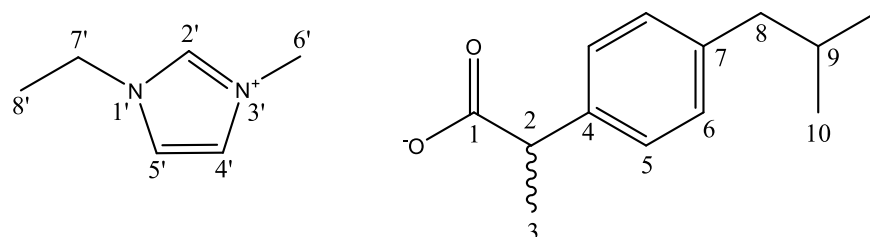

<sup>1</sup>H NMR (400 MHz, D<sub>2</sub>O): δ/ppm = 8.58 (s, 1H, 2'), 7.37 (s, 1H, 4'), 7.30 (s, 1H, 5'), 7.18 (d, *J* = 7.9 Hz, 2H, 6), 7.12 (d, *J* = 7.9 Hz, 2H, 5), 4.11 (q, *J* = 7.4 Hz, 2H, 7'), 3.77 (s, 3H, 6'), 3.53 (m, 1H, 2), 2.38 (d, *J* = 7.1 Hz, 2H, 8), 1.74 (dp, *J* = 13.5, 6.7 Hz, 1H, 9), 1.39 (t, *J* = 7.4 Hz, 3H, 8'), 1.30 (d, *J* = 7.2 Hz, 3H, 3), 0.78 (d, *J* = 6.6 Hz, 6H, 10). <sup>13</sup>C NMR (101 MHz, DMSO): δ/ppm = 183.92 (s, 1), 140.71 (s, 7), 140.42 (s, 4), 129.40 (s, 6), 127.12 (s, 5), 123.36 (s, 4'), 121.78 (s, 5'), 48.18 (s, 7'), 44.70 (s, 8), 44.17 (s, 2), 35.49 (s, 6'), 29.69 (s, 9), 21.58 (s, 10), 18.43 (s, 3), 14.40 (s, 8').

<sup>1</sup>H NMR (400 MHz, DMSO): δ/ppm = 9.48 (s, 1H, 2'), 7.79 (s, 1H, 4'), 7.70 (s, 1H, 5'), 7.14 (d, *J* = 7.8 Hz, 2H, 5), 6.94 (d, *J* = 7.8 Hz, 2H, 6), 4.18 (q, *J* = 7.3 Hz, 2H, 7'), 3.84 (s, 3H, 6'), 3.15 (q, *J* = 7.1 Hz, 1H, 2), 2.37 (d, *J* = 7.1 Hz, 2H, 8), 1.78 (dp, *J* = 13.3, 6.8 Hz, 1H, 9), 1.40 (t, *J* = 7.3 Hz, 3H, 8'), 1.19 (d, *J* = 7.1 Hz, 3H, 3), 0.86 (d, *J* = 6.6 Hz, 6H, 10). <sup>13</sup>C NMR (101 MHz, DMSO): δ/ppm = 175.76 (s, 1), 144.45 (s, 2'), 137.55 (s, 7), 137.27 (s, 4), 128.35 (s, 6), 127.64 (s, 5), 123.97 (s, 4'), 122.38 (s, 5'), 49.65 (s, 7'), 44.86 (s, 8), 44.50 (s, 2), 36.06 (s, 6'), 30.19 (s, 9), 22.69 (s, 10), 20.86 (s, 3), 15.60 (s, 8').

### 1-(2-Hydroxyethyl)-3-methylimidazolium ibuprofenate ([C<sub>2(OH)</sub>C<sub>1</sub>Im][Ibu])

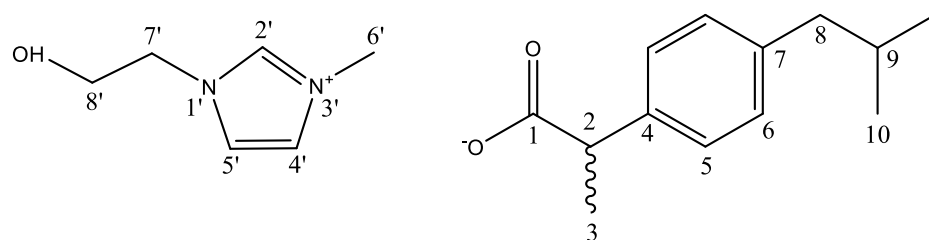

<sup>1</sup>H NMR (500 MHz, D<sub>2</sub>O): δ/ppm = 7.41 (d, *J* = 1.9 Hz, 1H, 4'), 7.36 (d, *J* = 1.8 Hz, 1H, 5'), 7.18 (dd, *J* = 4.7, 3.2 Hz, 2H, 6), 7.12 (dd, *J* = 4.9, 3.0 Hz, 2H, 5), 4.26 – 4.19 (m, 2H, 7'), 3.88 – 3.78 (m, 5H, 6', 8'), 3.51 (m, 1H, 2), 2.39 (dd, *J* = 6.9, 3.5 Hz, 2H, 8), 1.75 (ddd, *J* = 20.1, 10.1, 4.9 Hz, 1H, 9), 1.30 (dd, *J* = 7.1, 3.6 Hz, 3H, 3), 0.91 – 0.68 (m, 6H, 10). <sup>13</sup>C NMR (126 MHz, D<sub>2</sub>O): δ/ppm = 183.97 (s, 2'), 140.68 (s, 7), 140.44 (s, 4), 129.39 (s, 6), 127.09 (s, 5), 123.52 (s, 4'), 122.35 (s, 5'), 59.70 (s, 7'), 51.45 (s, 8), 48.15 (s, 2), 44.15 (s, 8'), 35.61 (s, 6'), 29.67 (s, 9), 21.55 (s, 10), 18.40 (s, 3).

<sup>1</sup>H NMR (400 MHz, DMSO): δ/ppm = 9.31 (s, 1H, 2'), 7.73 (s, 1H, 4'), 7.67 (s, 1H, 5'), 7.15 (d, *J* = 7.8 Hz, 2H, 6), 6.96 (d, *J* = 7.8 Hz, 2H, 5), 4.21 (t, *J* = 4.9 Hz, 2H, 7'), 3.83 (s, 3H, 6'), 3.69 (dd, *J* = 13.8, 8.9 Hz, 2H, 8'), 3.18 (q, *J* = 7.1 Hz, 1H, 2), 2.36 (t, *J* = 8.1 Hz, 2H, 8), 1.87 – 1.68 (m, 1H, 9), 1.19 (d, *J* = 7.1 Hz, 3H, 3), 0.85 (d, *J* = 6.6 Hz, 6H, 10). <sup>13</sup>C NMR (101 MHz, DMSO): δ/ppm = 176.29 (s, 1), 144.09 (s, 2'), 137.75 (s, 7), 137.62 (s, 4), 128.45 (s, 6), 127.64 (s, 5), 123.62 (s, 4'), 123.14 (s, 5'), 59.66 (s, 7'), 52.02 (s, 8), 49.39 (s, 2), 44.84 (s, 8'), 36.05 (s, 6'), 30.20 (s, 9), 22.70 (s, 10), 20.77 (s, 3).

**Cholinium ibuprofenate ([N<sub>1112</sub>(OH)][Ibul])**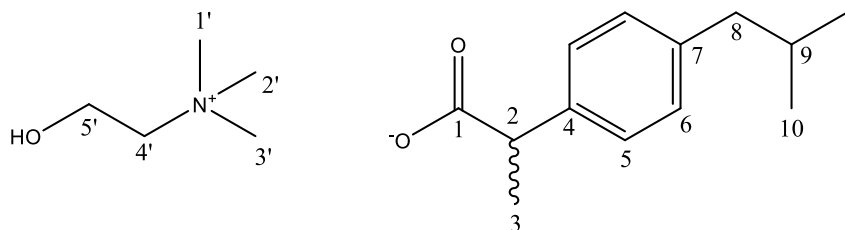

<sup>1</sup>H NMR (500 MHz, D<sub>2</sub>O):  $\delta$ /ppm = 7.19 (d,  $J$  = 8.1 Hz, 2H, 6), 7.13 (d,  $J$  = 8.0 Hz, 2H, 5), 4.01 – 3.91 (m, 2H, 5'), 3.60 – 3.46 (m, 1H, 2), 3.46 – 3.36 (m, 2H, 4'), 3.10 (s, 9H, 1', 2', 3'), 2.40 (d,  $J$  = 7.1 Hz, 2H, 8), 1.82 – 1.67 (m, 1H, 9), 1.30 (d,  $J$  = 7.2 Hz, 3H, 3), 0.79 (d,  $J$  = 6.6 Hz, 6H, 10). <sup>13</sup>C NMR (126 MHz, D<sub>2</sub>O) :  $\delta$ /ppm = 183.96 (s, 1), 140.69 (s, 7), 140.43 (s, 4), 129.41 (s, 6), 127.10 (s, 5), 68.57 – 65.25 (m, 5'), 55.55 (s, 4'), 54.66 – 53.28 (m, 1', 2', 3'), 48.15 (s, 8), 44.15 (s, 2), 29.68 (s, 9), 21.56 (s, 10), 18.41 (s, 3).

<sup>1</sup>H NMR (500 MHz, DMSO):  $\delta$ /ppm = 7.15 (d,  $J$  = 8.0 Hz, 2H, 5), 6.96 (d,  $J$  = 8.0 Hz, 2H, 6), 3.90 – 3.73 (m, 2H, 5'), 3.18 (q,  $J$  = 7.1 Hz, 1H, 2), 3.09 (s, 9H, 1', 2', 3'), 2.37 (d,  $J$  = 7.1 Hz, 2H, 8), 1.77 (dq,  $J$  = 20.1, 6.7 Hz, 1H, 9), 1.20 (d,  $J$  = 7.1 Hz, 3H, 3), 0.86 (d,  $J$  = 6.6 Hz, 6H, 10). <sup>13</sup>C NMR (126 MHz, DMSO) :  $\delta$ /ppm = 176.34 (s, 1), 144.07 (s, 7), 137.77 (s, 4), 128.46 (s, 6), 127.64 (s, 5), 67.68 (s, 5'), 55.43 (s, 4'), 54.01 – 53.24 (m, 1', 2', 3'), 49.35 (s, 8), 44.84 (s, 2), 30.19 (s, 9), 22.70 (s, 10), 20.79 (s, 3).

**Figure S1.** DSC profile and analysis with TA Instruments Universal Analysis V4.5A software at 1°C/min of ibuprofen.

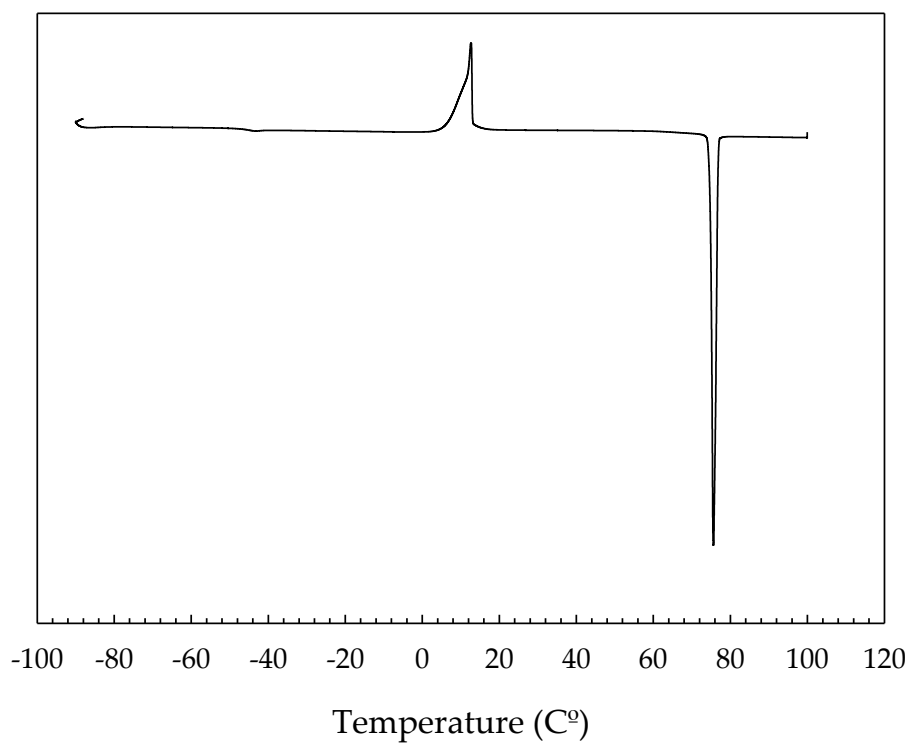

**Figure S2.** DSC profile and analysis with TA Instruments Universal Analysis V4.5A software at 1°C/min of [C<sub>2</sub>C<sub>1</sub>Im][Ibu].

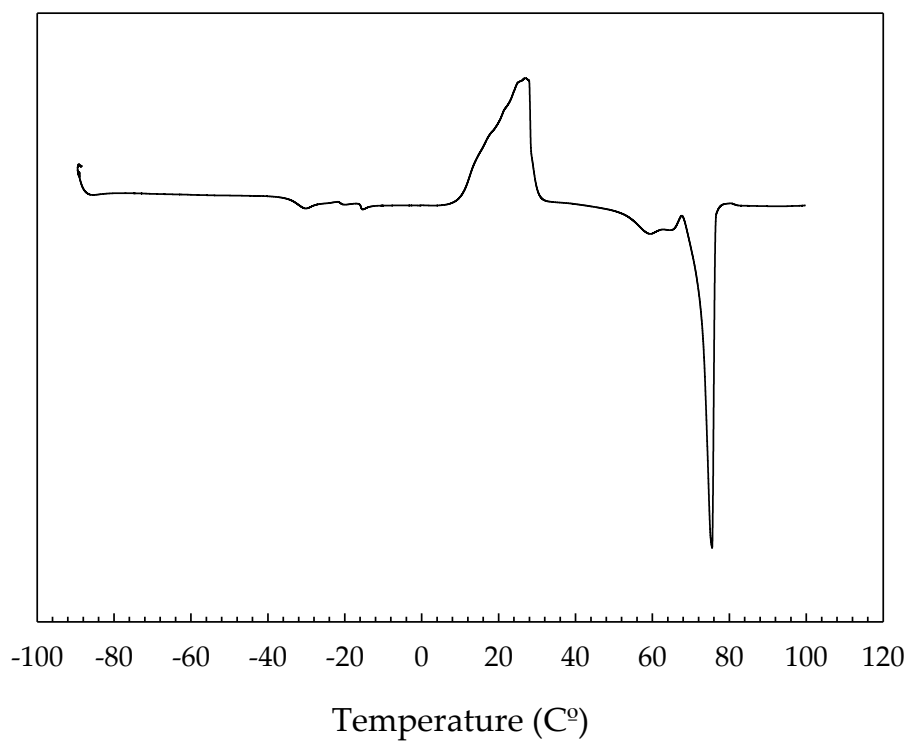

**Figure S3.** DSC profile and analysis with TA Instruments Universal Analysis V4.5A software at 1°C/min of [C<sub>2</sub>(OH)C<sub>1</sub>Im][Ibu].

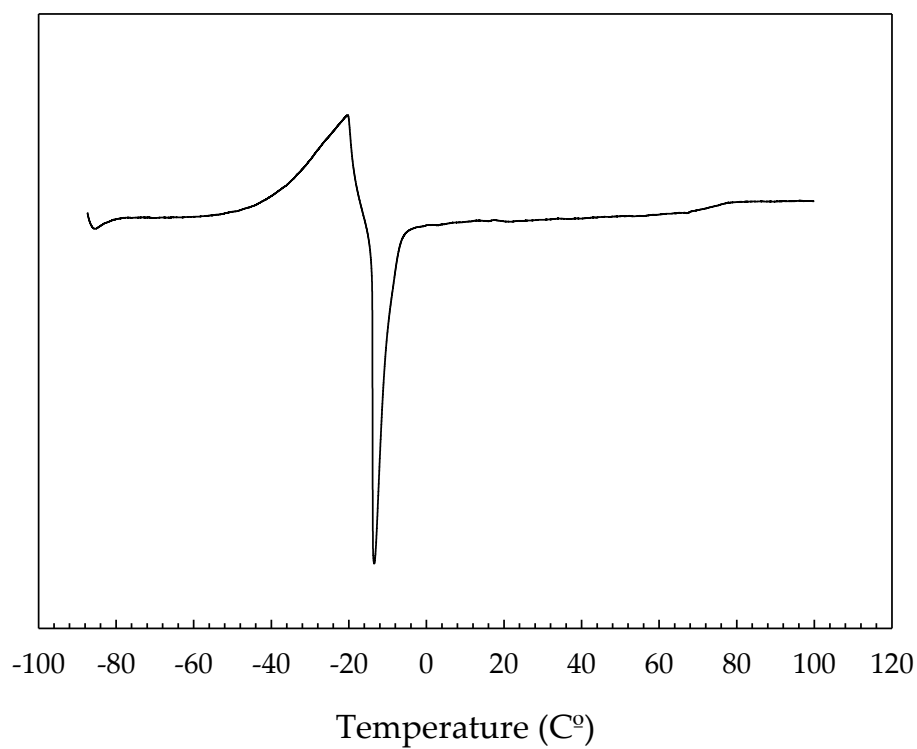

**Figure S4.** DSC profile and analysis with TA Instruments Universal Analysis V4.5A software at 1°C/min of [N<sub>1112</sub>(OH)][Ibu].

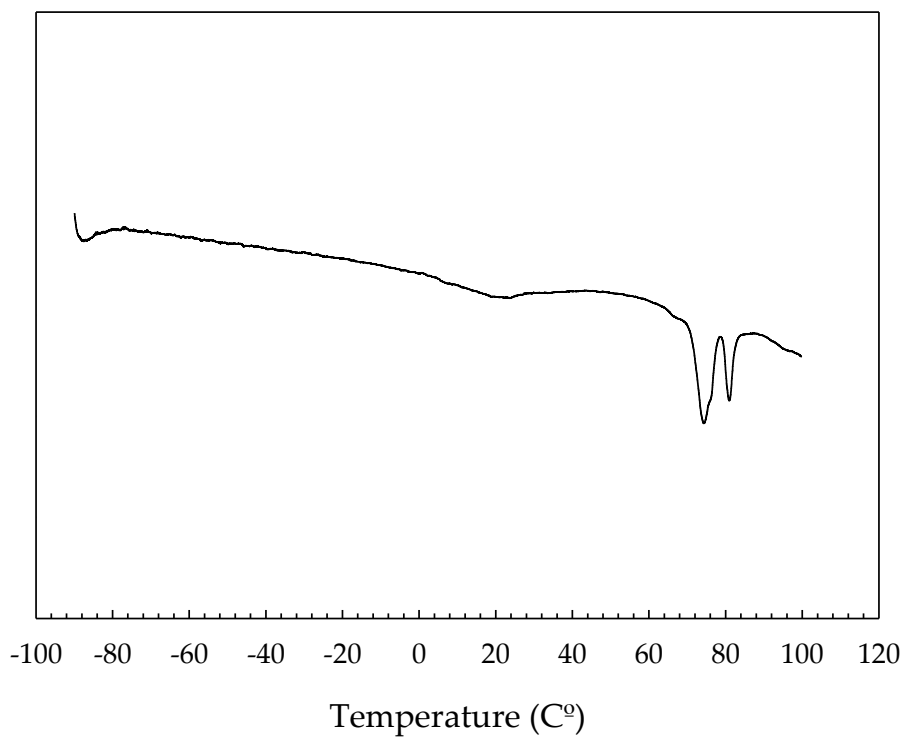

**Table S1.** Chemical shifts for the hydrogens in the position 2 and 3 (as depicted chemical structure of ibuprofen on the right) for ibuprofen, sodium ibuprofen and API-ILs in D<sub>2</sub>O.

| Compounds                                   | H2<br>( $\delta$ /ppm) | H3<br>( $\delta$ /ppm) |
|---------------------------------------------|------------------------|------------------------|
| Ibuprofen                                   | 3.58                   | 1.33                   |
| Na[Ibu]                                     | 3.53                   | 1.31                   |
| [C <sub>2</sub> C <sub>1</sub> Im][Ibu]     | 3.53                   | 1.30                   |
| [C <sub>2</sub> (OH)C <sub>1</sub> Im][Ibu] | 3.51                   | 1.30                   |
| [N <sub>1112</sub> (OH)][Ibu]               | 3.53                   | 1.30                   |

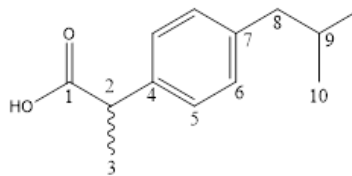

**Figure S5.** Non-linear regression fitting curves, calculated Log EC<sub>50</sub> ± standard deviation and respective R-squared and p-value for ibuprofen (A), [C<sub>2</sub>C<sub>1</sub>Im][Ibu] (B), [C<sub>2</sub>(OH)C<sub>1</sub>Im][Ibu] (C), [N<sub>1112</sub>(OH)][Ibu] (D), [C<sub>2</sub>C<sub>1</sub>Im]Cl (E), [C<sub>2</sub>(OH)C<sub>1</sub>Im]Cl (F) and [N<sub>1112</sub>(OH)]Cl (G) in Caco-2 cell line.

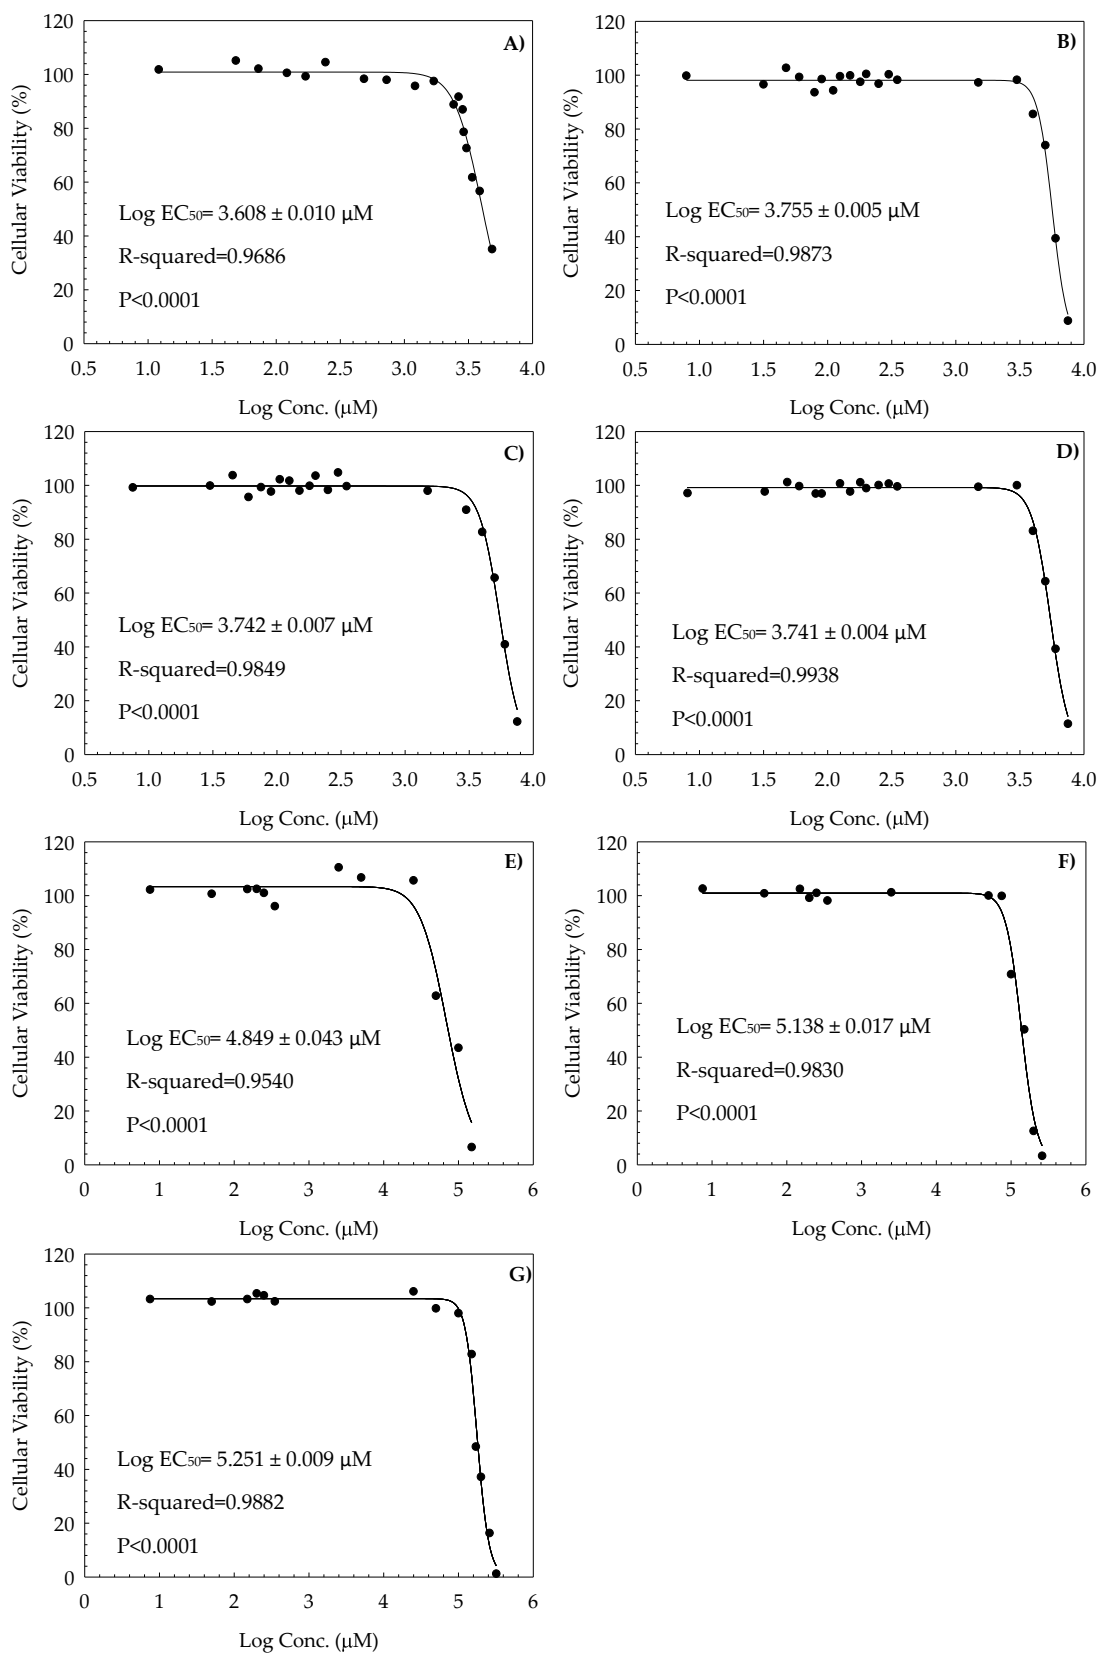



**Figure S6.**  $EC_{50}$  values of ibuprofen, ibuprofen-based ILs and IL/salt cation “suppliers” for the API-ILs ( $[C_2C_1Im]Cl$ ,  $[C_{2(OH)}C_1Im]Cl$ ,  $[N_{1112(OH)}]Cl$ ) in Caco-2 cell line exposed to the compounds for 24h. The R-squared was greater than 0.9540 and  $P < 0.0001$  for all fitted curves.

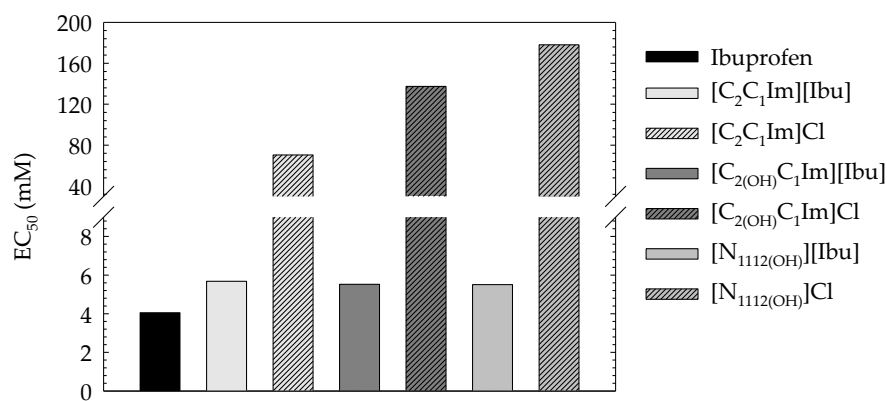

**Table S2.** Inhibition of BSA denaturation in PBS pH 7.4 at different concentrations for the neutral and salt form of ibuprofen and API-ILs. The presented value is the mean of at least two independent measures  $\pm$  standard deviation.

| Concentration (mM)                      | Inhibition of BSA denaturation (%) | Concentration (mM)                          | Inhibition of BSA denaturation (%) |
|-----------------------------------------|------------------------------------|---------------------------------------------|------------------------------------|
| Ibuprofen                               |                                    | Sodium Ibuprofen                            |                                    |
| 0.727                                   | 19.93 $\pm$ 2.00                   | 0.657                                       | 20.15 $\pm$ 1.10                   |
| 1.697                                   | 42.85 $\pm$ 1.97                   | 1.533                                       | 36.97 $\pm$ 1.61                   |
| 2.424                                   | 67.66 $\pm$ 2.49                   | 2.190                                       | 61.24 $\pm$ 4.24                   |
| 3.636                                   | 76.40 $\pm$ 1.32                   | 3.286                                       | 69.54 $\pm$ 4.81                   |
| 4.848                                   | 74.34 $\pm$ 1.32                   |                                             |                                    |
| [C <sub>2</sub> C <sub>1</sub> Im][Ibu] |                                    | [C <sub>2(OH)</sub> C <sub>1</sub> Im][Ibu] |                                    |
| 0.474                                   | 23.30 $\pm$ 1.15                   | 0.451                                       | 43.67 $\pm$ 3.21                   |
| 1.106                                   | 48.77 $\pm$ 2.52                   | 1.053                                       | 70.99 $\pm$ 3.81                   |
| 1.580                                   | 55.56 $\pm$ 2.73                   | 1.504                                       | 82.25 $\pm$ 0.44                   |
| 2.370                                   | 63.27 $\pm$ 2.08                   | 2.256                                       | 86.27 $\pm$ 0.95                   |
| [N <sub>1112(OH)</sub> ][Ibu]           |                                    |                                             |                                    |
| 0.485                                   | 31.79 $\pm$ 1.57                   |                                             |                                    |
| 1.131                                   | 39.66 $\pm$ 1.33                   |                                             |                                    |
| 1.616                                   | 50.93 $\pm$ 2.00                   |                                             |                                    |
| 2.424                                   | 59.41 $\pm$ 0.79                   |                                             |                                    |
